# Supplementary material
Source: PubMed Central journal article supplement (PMC5737597)
Supplement: ba005876-suppl1.pdf [file ba005876-suppl1.pdf]

**Supplementary Table 1: Ratio of the age groups 15 to 64 years and > 64 years in different countries (arranged according to ratio in 2030, sorted into groups A-D (Fig. 1)<sup>19,27-31</sup>)**

|          |                                   | <b>2005</b> | <b>2010</b> | <b>2015</b> | <b>2020</b> | <b>2030</b> |
|----------|-----------------------------------|-------------|-------------|-------------|-------------|-------------|
| <b>A</b> | <b>Norway</b>                     | 4.46        | 4.44        | 4.09        | 3.81        | 3.33        |
|          | <b>Ireland</b>                    | 6.14        | 6.05        | 4.99        | 4.31        | 3.30        |
|          | <b>USA</b>                        | 5.41        | 5.13        | 4.44        | 3.84        | 2.99        |
|          | <b>Belgium</b>                    | 3.81        | 3.83        | 3.61        | 3.40        | 2.90        |
|          | <b>United Kingdom</b>             | 4.15        | 4.06        | 3.65        | 3.39        | 2.87        |
| <b>B</b> | <b>Czech Republic</b>             | 5.04        | 4.60        | 3.76        | 3.20        | 2.84        |
|          | <b>Poland</b>                     | 5.36        | 5.23        | 4.52        | 3.69        | 2.82        |
|          | <b>Sweden</b>                     | 3.79        | 3.61        | 3.22        | 3.03        | 2.82        |
|          | <b>Switzerland</b>                | 4.30        | 4.05        | 3.78        | 3.49        | 2.80        |
|          | <b>Denmark</b>                    | 4.41        | 4.02        | 3.46        | 3.19        | 2.74        |
| <b>C</b> | <b>Canada</b>                     | 5.33        | 4.92        | 4.21        | 3.60        | 2.68        |
|          | <b>Austria</b>                    | 4.28        | 3.84        | 3.63        | 3.42        | 2.67        |
|          | <b>France</b>                     | 3.99        | 3.90        | 3.42        | 3.06        | 2.56        |
|          | <b>Spain</b>                      | 4.15        | 4.07        | 3.58        | 3.29        | 2.53        |
|          | <b>Netherlands</b>                | 4.82        | 4.39        | 3.68        | 3.24        | 2.49        |
| <b>D</b> | <b>Italy</b>                      | 3.41        | 3.21        | 2.97        | 2.86        | 2.45        |
|          | <b>Finland</b>                    | 4.19        | 3.91        | 3.20        | 2.80        | 2.42        |
|          | <b>Portugal</b>                   | 3.88        | 3.63        | 3.22        | 2.91        | 2.32        |
|          | <b>Germany</b>                    | 3.60        | 3.18        | 3.13        | 2.79        | 2.13        |
|          | <b>Mecklenburg-West Pomerania</b> | 3.55        | 3.01        | 2.81        | 2.35        | 1.78        |

Demographics and blood supply

**Supplementary Table 2: Characteristics of the recipients of red blood cell concentrates and the donors of whole blood by type of hospital or type of blood center (year 2015)**

Recipients of red blood cell concentrate transfusions (in-hospital transfusions)

|                    | Overall | University hospitals<br>Greifswald and<br>Rostock | All other hospitals |
|--------------------|---------|---------------------------------------------------|---------------------|
| N                  | 82,591  | 24,659                                            | 57,923              |
| % female           | 43.2    | 37.3                                              | 45.6                |
| median age (years) | 71.6    | 67.2                                              | 73.1                |

recipients: transfusions / 1,000 population

| Age group | Total | Male              | Female |
|-----------|-------|-------------------|--------|
| 0-19      | 4.2   | 4.4               | 4.1    |
| 20-39     | 7.2   | 5.6               | 9.1    |
| 40-59     | 37.2  | 45.1              | 28.8   |
| 60-79     | 103.4 | 136.9             | 73.4   |
| ≥ 80      | 190.1 | 235.9             | 149.6  |
| Total     | 51.2* | 58.6 <sup>#</sup> | 42.5   |

Whole blood donors

|                                    | Overall | Hospital-based blood<br>centers/private blood<br>service | Red Cross Blood<br>Donation Service |
|------------------------------------|---------|----------------------------------------------------------|-------------------------------------|
| Number of whole<br>blood donations | 97,045  | 23,578 / 10,951                                          | 62,516                              |
| % female                           | 45.0§   | 43.0 / 33.1                                              | 47.8                                |
| median age (years)                 | 45      | 32 / 28                                                  | 50                                  |

\* including 9 patients with missing age and 271 with missing sex; # including 7 patients with missing age § including 1 blood donor with missing sex
